# Supplementary material for: EvatCrop: a novel hybrid quasi-fuzzy artificial neural network (ANN) model for estimation of reference evapotranspiration
Source: PeerJ. 2024 May 31;12:e17437. doi: 10.7717/peerj.17437 (PMC11146332; doi:10.7717/peerj.17437)
Supplement: Supplemental Information 4 [file peerj-12-17437-s004.docx]

**Table 3.** Input combinations, rule groups, number of rules and the interim output vectors.

| Input Combinations | Rule groups | Number of rules | Interim output vectors |
| --- | --- | --- | --- |
| *C*1={*Tmin*, *Tmax*} | *RG*1 | 8 | {*I*}1 |
| *C*2={*Tmin*, *Tmax*, *Ws*} | *RG*2 | 27 | {*I*}2 |
| *C*3={*Tmin*, *Tmax*, *Rh*} | *RG*3 | 27 | {*I*}3 |
| *C*4={*Tmin* ,*Tmax*, *Sr*} | *RG*4 | 27 | {*I*}4 |
| *C*5={*Tmin*, *Tmax*, *Ws*, *Rh*} | *RG*5 | 81 | {*I*}5 |
| *C*6={*Tmin*, *Tmax*, *Ws*, *Sr*} | *RG*6 | 81 | {*I*}6 |
| *C*7={*Tmin*, *Tmax*, *Rh*, *Sr*} | *RG*7 | 81 | {*I*}7 |
| *C*8={*Tmin*, *Tmax*, *Ws*, *Rh*, S*r*} | *RG*8 | 243 | {*I*}8 |
