# Supplementary material for: EvatCrop: a novel hybrid quasi-fuzzy artificial neural network (ANN) model for estimation of reference evapotranspiration
Source: PeerJ journal article supplement (doi:10.7717/peerj.17437), 2024-05-31
Supplement: Supplementary_Fig2.pdf [file Supplementary_Fig2.pdf]

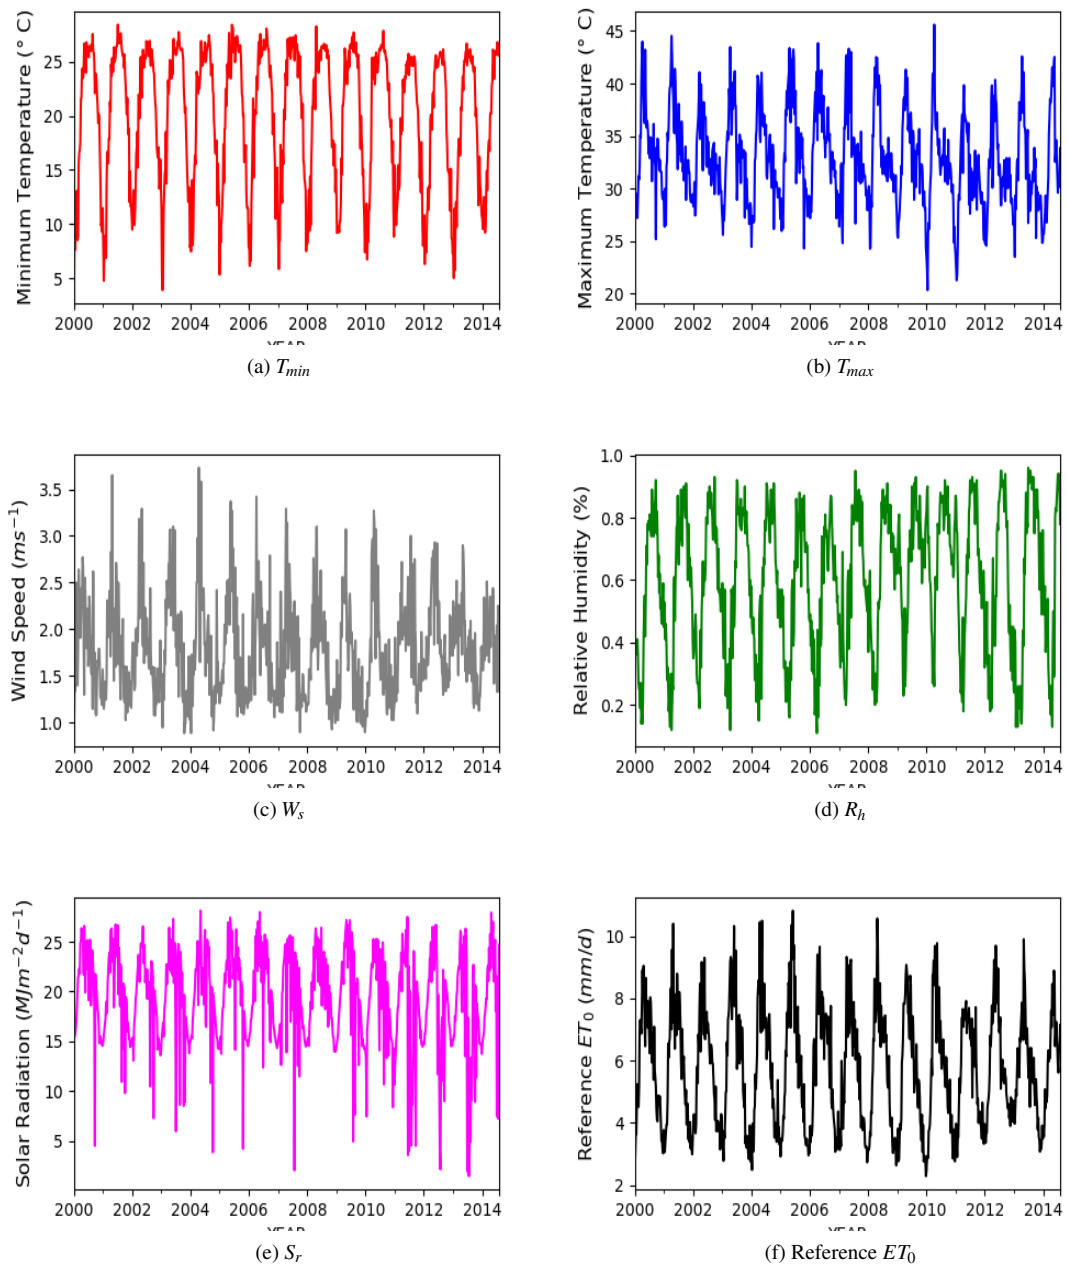

Figure 1: Time series plots for each of the input parameters and reference  $ET_0$  for Berubari
