# Supplementary material for: EvatCrop: a novel hybrid quasi-fuzzy artificial neural network (ANN) model for estimation of reference evapotranspiration
Source: PeerJ journal article supplement (doi:10.7717/peerj.17437), 2024-05-31
Supplement: Supplementary_Fig8.pdf [file Supplementary_Fig8.pdf]

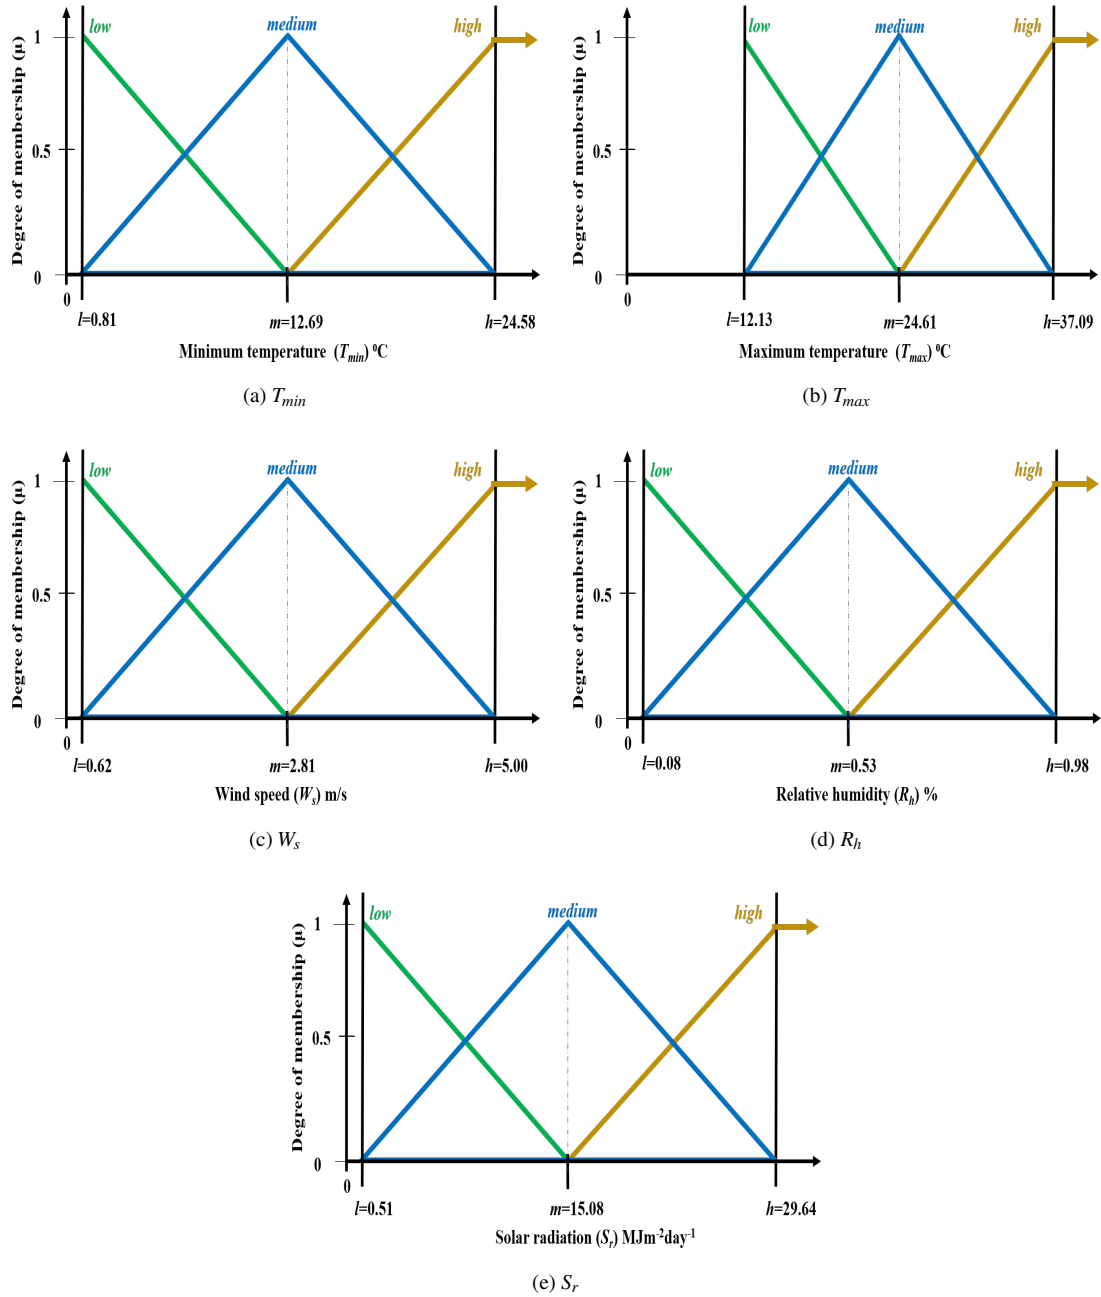

Figure 8: The shapes and range of values of fuzzy membership functions of each input parameter for Jayanti
