# Supplementary material for: EvatCrop: a novel hybrid quasi-fuzzy artificial neural network (ANN) model for estimation of reference evapotranspiration
Source: PeerJ journal article supplement (doi:10.7717/peerj.17437), 2024-05-31
Supplement: Supplementary_Fig14.pdf [file Supplementary_Fig14.pdf]

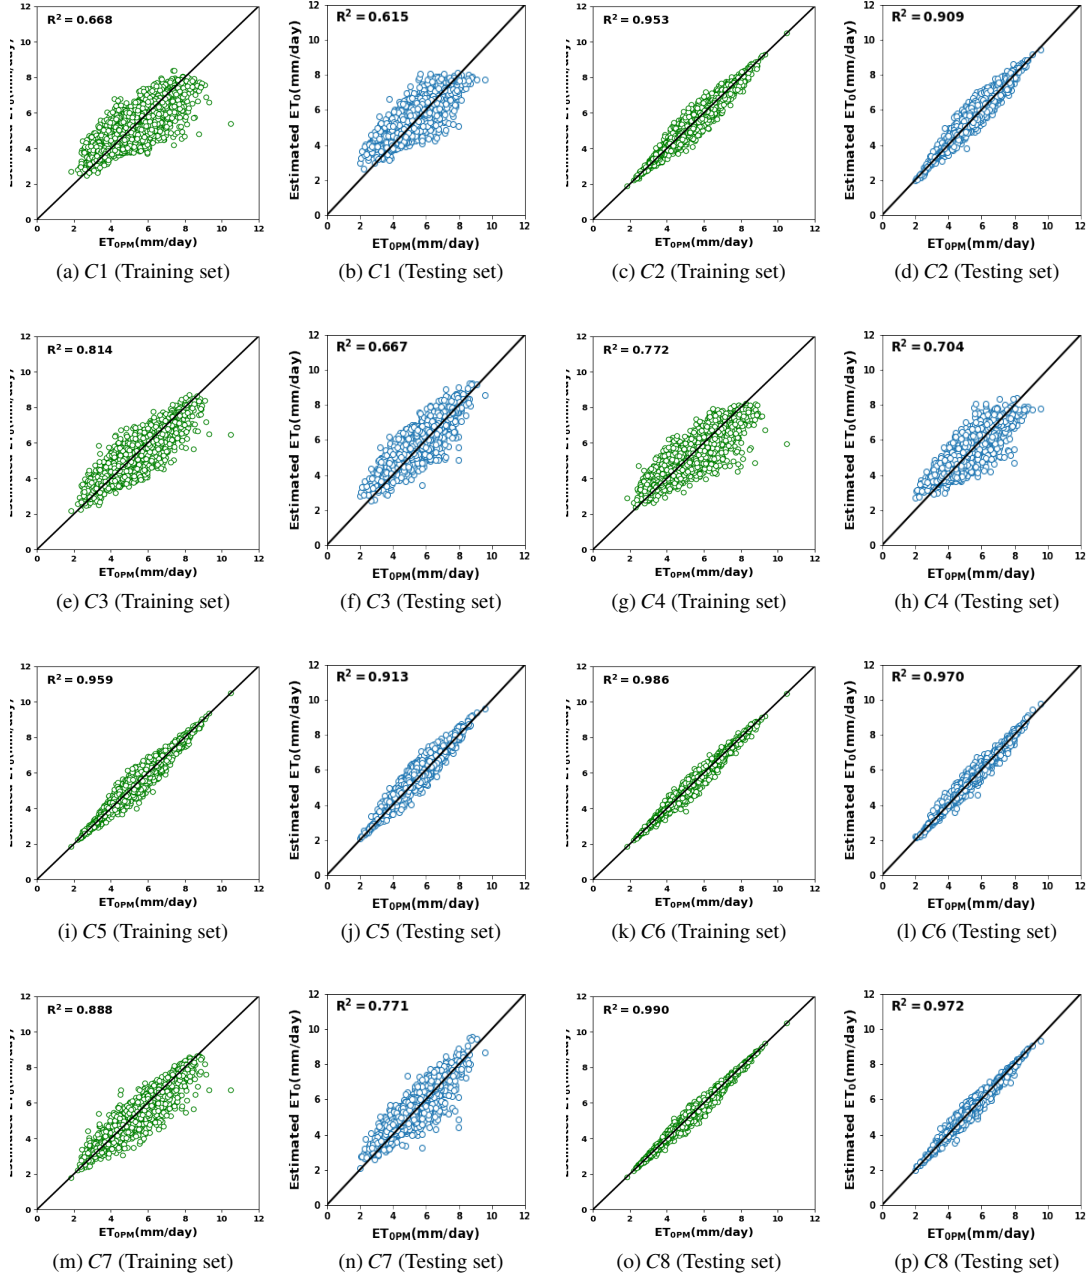

Figure 14: Scatter plots of estimated  $ET_0$  against  $ET_{0PM}$  obtained for the training and testing sets of Jayanti
