# Supplementary material for: EvatCrop: a novel hybrid quasi-fuzzy artificial neural network (ANN) model for estimation of reference evapotranspiration
Source: PeerJ journal article supplement (doi:10.7717/peerj.17437), 2024-05-31
Supplement: Supplementary_Fig20.pdf [file Supplementary_Fig20.pdf]

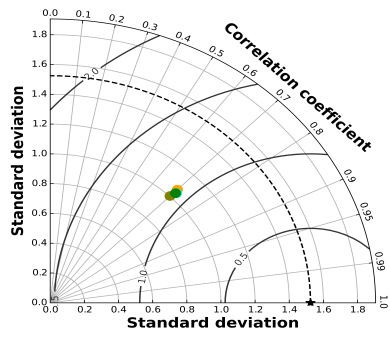

(a) C1

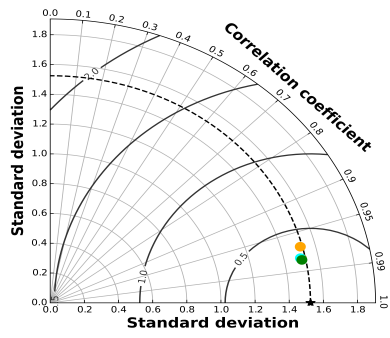

(b) C2

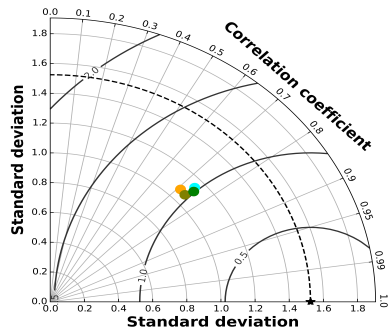

(c) C3

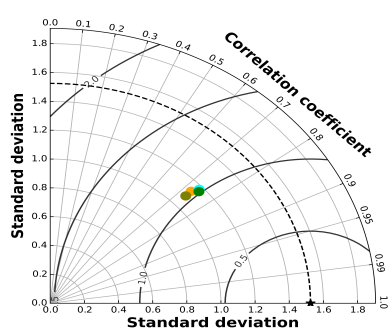

(d) C4

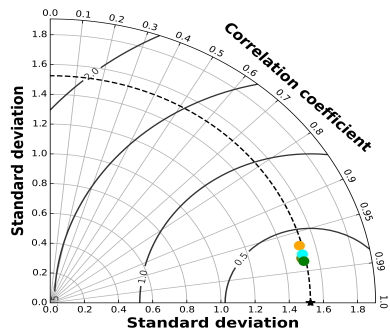

(e) C5

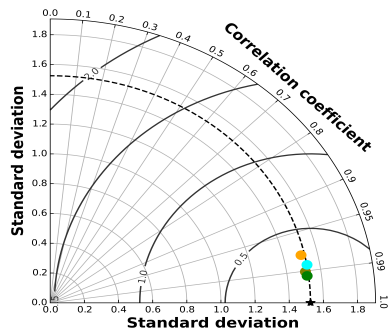

(f) C6

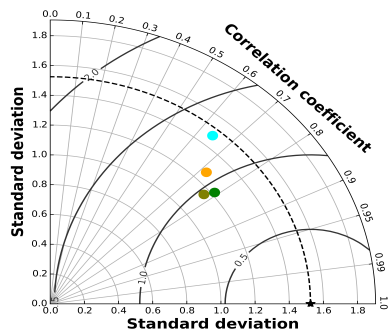

(g) C7

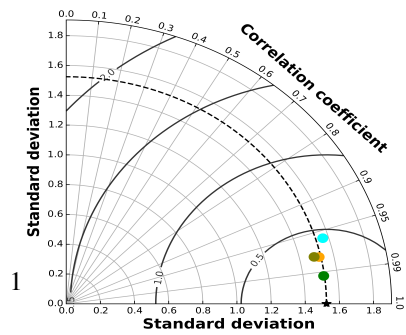

(h) C8

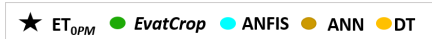

Figure 20: Taylor diagrams for estimated  $ET_0$  of DT, ANN, ANFIS, *EvatCrop*, and  $ET_{0PM}$  obtained for the testing set of Tamaguri
