# Supplementary material for: EvatCrop: a novel hybrid quasi-fuzzy artificial neural network (ANN) model for estimation of reference evapotranspiration
Source: PeerJ journal article supplement (doi:10.7717/peerj.17437), 2024-05-31
Supplement: Supplementary_Fig21.pdf [file Supplementary_Fig21.pdf]

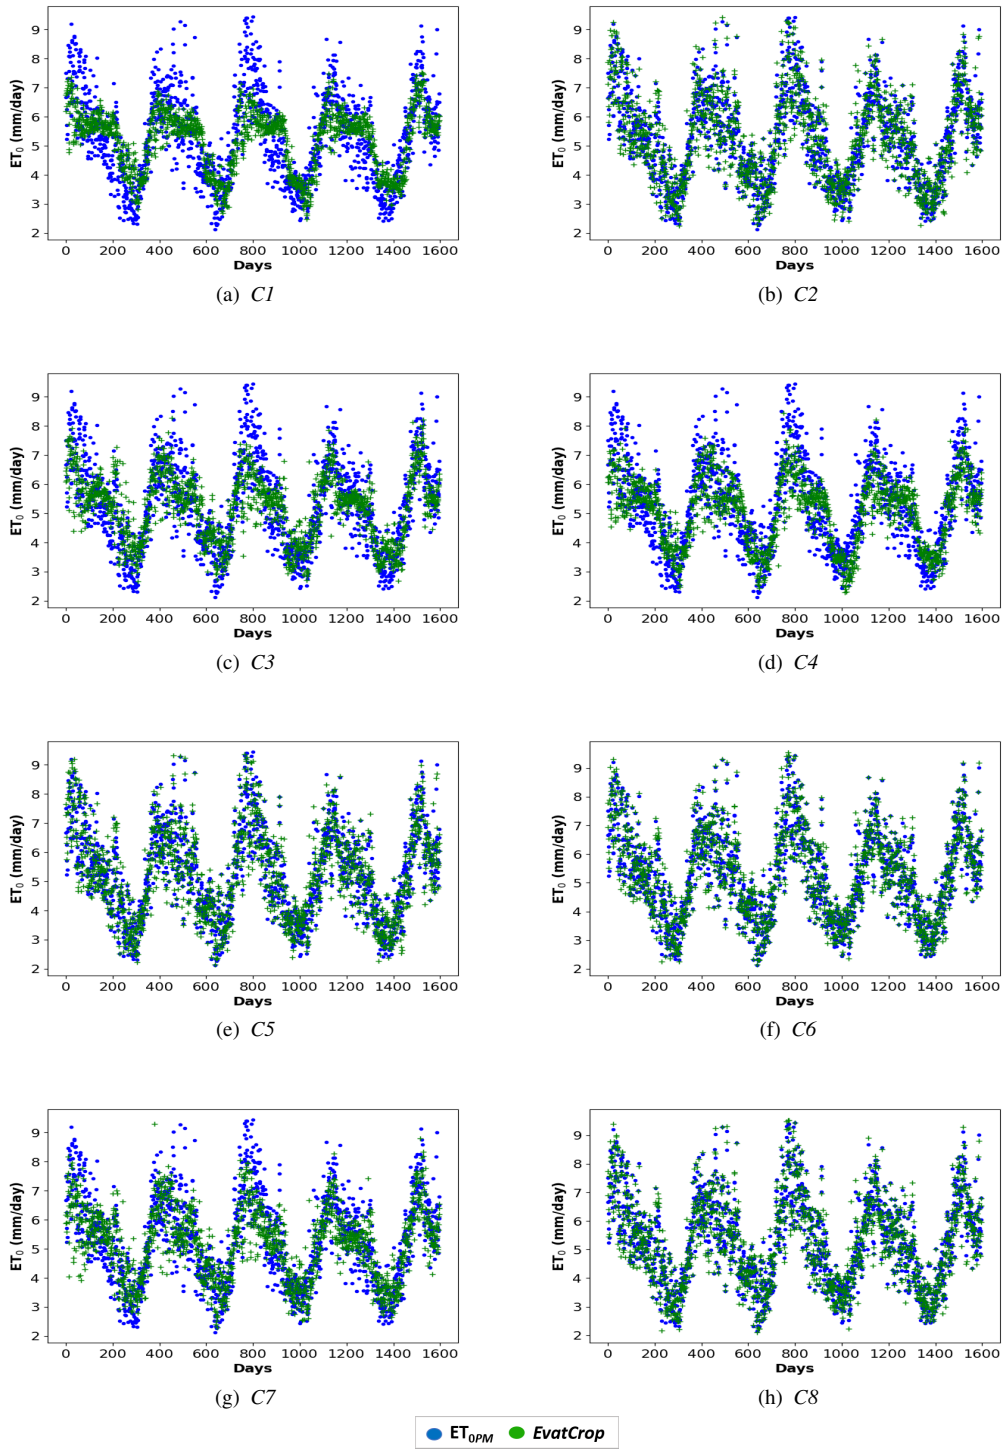

Figure 21: Distribution plots for estimated  $ET_0$  of  $EvatCrop$ , and  $ET_{0PM}$  obtained for the testing set of Tamaguri
